# Supplementary material for: Quality of Radiomic Features in Glioblastoma Multiforme: Impact of Semi-Automated Tumor Segmentation Software
Source: PubMed Central journal article supplement — Korean J Radiol. 2017 Apr 3;18(3):498–509. doi: 10.3348/kjr.2017.18.3.498 (PMC5390619; doi:10.3348/kjr.2017.18.3.498), 2017-04-03
Supplement: kjr-18-498-s002.pdf [file kjr-18-498-s002.pdf]

Supplementary Table 1. Clustered Feature Lists of TumorPrism3D and 3D Slicer

| TumorPrism3D |                            |             |                            | 3D Slicer   |                            |             |                            |
|--------------|----------------------------|-------------|----------------------------|-------------|----------------------------|-------------|----------------------------|
| Rater 1      |                            | Rater 2     |                            | Rater 1     |                            | Rater 2     |                            |
| Cluster No.  | Feature Name               | Cluster No. | Feature Name               | Cluster No. | Feature Name               | Cluster No. | Feature Name               |
| 1            | Area_CE                    | 1           | Area_CE                    | 1           | Proportion_CE              | 1           | Volume_CE                  |
| 1            | Longestaxis_CE             | 1           | Longestaxis_CE             | 1           | Area_CE                    | 1           | Proportion_CE              |
| 1            | Proportion_CE              | 1           | Area_NH                    | 1           | Longestaxis_NH             | 1           | Longestaxis_CE             |
| 1            | Spherical.disproportion_NC | 1           | Longestaxis_NH             |             |                            | 1           | Area_CE                    |
| 1            | Surface.to.volume.ratio_CE | 1           | Surface.area_NH            | 2           | Slope_NC                   |             |                            |
| 1            | Spherical.disproportion_CE | 1           | Skewness_CE                | 2           | Slope_CE                   | 2           | Energy_CE                  |
| 1            | Surface.to.volume.ratio_NC | 1           | Longestaxis_NC             | 2           | Edgesharpness_CE           | 2           | Slope_CE                   |
| 1            | Area_NH                    | 1           | Volume_CE                  | 2           | Energy_CE                  | 2           | Maximum_CE                 |
| 1            | Longestaxis_NH             |             |                            | 2           | Maximum_CE                 | 2           | Mean_CE                    |
| 1            | Surface.area_NH            | 2           | Slope_CE                   | 2           | Mean_CE                    | 2           | Mean.absolute.deviation_CE |
|              |                            | 2           | Energy_CE                  | 2           | Mean.absolute.deviation_CE | 2           | Median_CE                  |
| 2            | Maximum_CE                 | 2           | Maximum_CE                 | 2           | Median_CE                  | 2           | Minimum_CE                 |
| 2            | Slope_CE                   | 2           | Mean_CE                    | 2           | Minimum_CE                 | 2           | Range_CE                   |
| 2            | Mean_CE                    | 2           | Mean.absolute.deviation_CE | 2           | Range_CE                   | 2           | RMS_CE                     |
| 2            | Mean.absolute.deviation_CE | 2           | Median_CE                  | 2           | RMS_CE                     | 2           | Standard.deviation_CE      |
| 2            | Median_CE                  | 2           | Minimum_CE                 | 2           | Standard.deviation_CE      | 2           | Variance_CE                |
| 2            | Minimum_CE                 | 2           | Range_CE                   | 2           | Variance_CE                | 2           | Slope_NC                   |
| 2            | Range_CE                   | 2           | RMS_CE                     | 2           | Maximum_NC                 | 2           | Maximum_NC                 |
| 2            | RMS_CE                     | 2           | Standard.deviation_CE      | 2           | Mean_NC                    | 2           | Mean_NC                    |
| 2            | Standard.deviation_CE      | 2           | Variance_CE                | 2           | Mean.absolute.deviation_NC | 2           | Mean.absolute.deviation_NC |
| 2            | Variance_CE                | 2           | Slope_NC                   | 2           | Median_NC                  | 2           | Median_NC                  |
| 2            | Maximum_NC                 | 2           | Energy_NC                  | 2           | Minimum_NC                 | 2           | Minimum_NC                 |
| 2            | Mean_NC                    | 2           | Maximum_NC                 | 2           | RMS_NC                     | 2           | RMS_NC                     |
| 2            | Mean.absolute.deviation_NC | 2           | Mean_NC                    | 2           | Standard.deviation_NC      | 2           | Variance_NC                |
| 2            | Median_NC                  | 2           | Mean.absolute.deviation_NC | 2           | Variance_NC                | 2           | Auto.correlation_CE        |
| 2            | Minimum_NC                 | 2           | Median_NC                  | 2           | Auto.correlation_CE        | 2           | Sum.average_CE             |
| 2            | Range_NC                   | 2           | Minimum_NC                 | 2           | Cluster.prominence_CE      | 2           | Sum.variance_CE            |
| 2            | RMS_NC                     | 2           | Range_NC                   | 2           | Sum.average_CE             | 2           | Variance_CE_T              |
| 2            | Standard.deviation_NC      | 2           | RMS_NC                     | 2           | Sum.variance_CE            | 2           | LRE_CE                     |
| 2            | Variance_NC                | 2           | Standard.deviation_NC      | 2           | Variance_CE_T              | 2           | LRLGLE_CE                  |
| 2            | Auto.correlation_CE        | 2           | Variance_NC                | 2           | LRE_CE                     | 2           | Auto.correlation_NC        |
| 2            | Cluster.prominence_CE      | 2           | Auto.correlation_CE        | 2           | LRLGLE_CE                  | 2           | Cluster.prominence_NC      |
| 2            | Sum.average_CE             | 2           | Cluster.prominence_CE      | 2           | LRHGLE_CE                  | 2           | Cluster.shade_NC           |
| 2            | Sum.variance_CE            | 2           | Cluster.tendency_CE        | 2           | Auto.correlation_NC        | 2           | Cluster.tendency_NC        |
| 2            | Variance_CE_T              | 2           | Contrast_CE                | 2           | Cluster.prominence_NC      | 2           | Sum.average_NC             |
| 2            | LRE_CE                     | 2           | Sum.average_CE             | 2           | Cluster.shade_NC           | 2           | Sum.variance_NC            |
| 2            | LRLGLE_CE                  | 2           | Sum.variance_CE            | 2           | Cluster.tendency_NC        | 2           | Variance_NC_T              |
| 2            | LRHGLE_CE                  | 2           | Variance_CE_T              | 2           | Contrast_NC                | 2           | LRE_NC                     |
| 2            | Auto.correlation_NC        | 2           | LRE_CE                     | 2           | Sum.average_NC             | 2           | LRLGLE_NC                  |
| 2            | Cluster.prominence_CE      | 2           | LRLGLE_CE                  | 2           | Sum.variance_NC            | 2           | LRHGLE_NC                  |
| 2            | Cluster.shade_NC           | 2           | LRHGLE_CE                  | 2           | Variance_NC_T              | 2           | Standard.deviation_NC      |
| 2            | Cluster.tendency_NC        | 2           | Auto.correlation_NC        | 2           | LRE_NC                     | 2           | Range_NC                   |
| 2            | Contrast_NC                | 2           | Cluster.prominence_CE      | 2           | LRLGLE_NC                  | 2           | Contrast_NC                |
| 2            | Sum.average_NC             | 2           | Cluster.shade_NC           | 2           | LRHGLE_NC                  | 2           | Energy_NC                  |
| 2            | Sum.variance_NC            | 2           | Cluster.tendency_NC        | 2           | Range_NC                   | 2           | Edgesharpness_NC           |
| 2            | Variance_NC_T              | 2           | Contrast_NC                | 2           | Edgesharpness_NC           | 2           | Edgesharpness_CE           |
| 2            | LRE_NC                     | 2           | Dissimilarity_NC           | 2           | Dissimilarity_NC           | 2           | Dissimilarity_NC           |
| 2            | LRLGLE_NC                  | 2           | Sum.average_NC             | 2           | Energy_NC                  |             |                            |
| 2            | LRHGLE_NC                  | 2           | Sum.variance_NC            |             |                            | 3           | Maximum.3D.diameter_NC     |
| 2            | Contrast_CE                | 2           | Variance_NC_T              | 3           | Volume_CE                  | 3           | Entropy_NC                 |
| 2            | Cluster.tendency_CE        | 2           | LRE_NC                     | 3           | Compactness1_CE            | 3           | Surface.area_NC            |
| 2            | Energy_NC                  | 2           | LRLGLE_NC                  | 3           | Dissimilarity_CE           | 3           | Volume_NC                  |
| 2            | Energy_CE                  | 2           | LRHGLE_NC                  | 3           | Difference.entropy_CE      | 3           | Maximum.3D.diameter_NH     |
| 2            | Dissimilarity_NC           | 2           | Surface.area_CE            | 3           | Surface.to.volume.ratio_NC | 3           | Difference.entropy_CE      |
|              |                            | 2           | Dissimilarity_CE           | 3           | Spherical.disproportion_NC | 3           | Dissimilarity_CE           |
| 3            | Volume_CE                  |             |                            | 3           | IMC2_CE                    | 3           | Entropy_CE_T               |
| 3            | Compactness1_CE            | 3           | Edgesharpness_CE           | 3           | Difference.entropy_NC      | 3           | IMC2_CE                    |
| 3            | Compactness1_NH            | 3           | Compactness1_CE            | 3           | Entropy_NC_T               | 3           | GLN_CE                     |
| 3            | Sphericity_NC              | 3           | Maximum.3D.diameter_CE     | 3           | IMC2_NC                    | 3           | RP_CE                      |
| 3            | Compactness2_NC            | 3           | Area_NC                    | 3           | Sum.entropy_NC             | 3           | LGLRE_CE                   |
| 3            | RP_NC                      | 3           | Edgesharpness_NC           | 3           | GLN_NC                     | 3           | Homogeneity1_NC            |
| 3            | Skewness_NC                | 3           | Proportion_NC              | 3           | RP_NC                      | 3           | Homogeneity2_NC            |
| 3            | Entropy_NC                 | 3           | Entropy_NC                 | 3           | Sum.entropy_CE             | 3           | IDMN_NC                    |
| 3            | Uniformity_NC              | 3           | Kurtosis_NC                | 3           | Entropy_CE_T               | 3           | HGLRE_NC                   |
| 3            | Compactness1_NC            | 3           | Skewness_NC                | 3           | LGLRE_CE                   | 3           | Area_NC                    |
| 3            | Maximum.3D.diameter_NC     | 3           | Uniformity_NC              | 3           | GLN_CE                     | 3           | Longestaxis_NC             |
| 3            | Maximum.3D.diameter_NH     | 3           | Compactness1_NC            | 3           | Entropy_NC                 | 3           | Proportion_NC              |
| 3            | Volume_NH                  | 3           | Compactness2_NC            | 3           | RP_CE                      | 3           | Cluster.tendency_CE        |
| 3            | Difference.entropy_CE      | 3           | Maximum.3D.diameter_NC     | 3           | Inverse.variance_NC        | 3           | Sum.entropy_CE             |
| 3            | Entropy_CE_T               | 3           | Sphericity_NC              | 3           | LGLRE_NC                   | 3           | IDN_NC                     |
| 3            | IMC2_CE                    | 3           | Surface.area_NC            | 3           | Correlation_NC             | 3           | RLN_NC                     |
| 3            | Sum.entropy_CE             | 3           | Volume_NC                  | 3           | Correlation_CE             | 3           | Energy_NC_T                |
| 3            | GLN_CE                     | 3           | Edgesharpness_NH           | 3           | Cluster.tendency_CE        | 3           | Kurtosis_NC                |
| 3            | RP_CE                      | 3           | Compactness1_NH            | 3           | Contrast_CE                | 3           | Maximum.Probability_NC     |
| 3            | LGLRE_CE                   | 3           | Maximum.3D.diameter_NH     | 3           | IDN_NC                     | 3           | Contrast_CE                |
| 3            | Correlation_NC             | 3           | Entropy_CE                 | 3           | IDMN_NC                    | 3           | Cluster.prominence_CE      |
| 3            | Homogeneity2_NC            | 3           | Proportion_NH              | 3           | Maximum.3D.diameter_NH     | 3           | Volume_NH                  |
| 3            | IDMN_NC                    | 3           | Volume_NH                  | 3           | Area_NC                    | 3           | Compactness1_NH            |
| 3            | IDN_NC                     | 3           | Correlation_CE             | 3           | Maximum.3D.diameter_CE     | 3           | Inverse.variance_NC        |
| 3            | Inverse.variance_NC        | 3           | Difference.entropy_CE      | 3           | Proportion_NC              | 3           | Entropy_NC_T               |
| 3            | LGLRE_NC                   | 3           | Entropy_CE_T               | 3           | Kurtosis_NC                | 3           | GLN_NC                     |
| 3            | HGLRE_NC                   | 3           | IMC2_CE                    | 3           | Skewness_NC                | 3           | Difference.entropy_NC      |
| 3            | Area_NC                    | 3           | IDMN_CE                    | 3           | Uniformity_NC              | 3           | Correlation_NC             |
| 3            | Maximum.3D.diameter_CE     | 3           | IDN_CE                     | 3           | Maximum.3D.diameter_NC     | 3           | IMC2_NC                    |
| 3            | Longestaxis_NC             | 3           | Sum.entropy_CE             | 3           | Volume_NC                  | 3           | Sum.entropy_NC             |
| 3            | Proportion_NC              | 3           | GLN_CE                     | 3           | Energy_NC_T                | 3           | RP_NC                      |
| 3            | Kurtosis_NC                | 3           | RP_CE                      | 3           | Homogeneity1_NC            | 3           | LGLRE_NC                   |
| 3            | Volume_NC                  | 3           | LGLRE_CE                   | 3           | Homogeneity2_NC            | 3           | Skewness_NC                |
| 3            | Energy_NC_T                | 3           | Correlation_NC             | 3           | Maximum.Probability_NC     | 3           | Correlation_CE             |
| 3            | Homogeneity1_NC            | 3           | Difference.entropy_NC      | 3           | RLN_NC                     | 3           | Proportion_NH              |
| 3            | Maximum.Probability_NC     | 3           | Energy_NC_T                | 3           | HGLRE_NC                   | 3           | Entropy_CE                 |
| 3            | RLN_NC                     | 3           | Entropy_NC_T               | 3           | Longestaxis_NC             |             |                            |

Supplementary Table 1. Clustered Feature Lists of TumorPrism3D and 3D Slicer (Continued)

| TumorPrism3D |                            |             |                            | 3D Slicer   |                            |             |                            |
|--------------|----------------------------|-------------|----------------------------|-------------|----------------------------|-------------|----------------------------|
| Rater 1      |                            | Rater 2     |                            | Rater 1     |                            | Rater 2     |                            |
| Cluster No.  | Feature Name               | Cluster No. | Feature Name               | Cluster No. | Feature Name               | Cluster No. | Feature Name               |
| 3            | Difference.entropy_NC      | 3           | Homogeneity1_NC            | 3           | Volume_NH                  | 4           | Proportion_NH              |
| 3            | Slope_NC                   | 3           | Homogeneity2_NC            | 3           | Compactness1_NH            | 4           | Compactness2_NC            |
| 3            | Entropy_NC_T               | 3           | IMC2_NC                    | 3           | Surface.area_NC            | 4           | Compactness1_NC            |
| 3            | IMC2_NC                    | 3           | IDMN_NC                    | 3           | Surface.area_CE            | 4           | Sphericity_NC              |
| 3            | Sum.entropy_NC             | 3           | IDN_NC                     | 3           | Longestaxis_CE             | 4           | Uniformity_NC              |
| 3            | GLN_NC                     | 3           | Inverse.variance_NC        |             |                            | 4           | Compactness1_CE            |
| 3            | Correlation_CE             | 3           | Maximum.Probability_NC     | 4           | Sphericity_NC              | 4           | Uniformity_CE              |
| 3            | Dissimilarity_CE           | 3           | Sum.entropy_NC             | 4           | Compactness1_NC            | 4           | Compactness2_CE            |
| 3            | Edgesharpness_NC           | 3           | GLN_NC                     | 4           | Skewness_CE                | 4           | Maximum.3D.diameter_CE     |
| 3            | Edgesharpness_CE           | 3           | RLN_NC                     | 4           | Kurtosis_CE                | 4           | Sphericity_CE              |
| 3            | Edgesharpness_NH           | 3           | RP_NC                      | 4           | Uniformity_CE              | 4           | Surface.area_CE            |
| 3            | Surface.area_NC            | 3           | LGLRE_NC                   | 4           | Compactness2_CE            | 4           | SRE_CE                     |
| 3            | Surface.area_CE            | 3           | HGLRE_NC                   | 4           | Sphericity_CE              | 4           | SRHGLE_CE                  |
|              |                            |             |                            | 4           | Compactness2_NC            | 4           | Skewness_CE                |
| 4            | Entropy_CE                 | 4           | Proportion_CE              | 4           | Compactness2_NH            | 4           | Kurtosis_CE                |
| 4            | Kurtosis_CE                | 4           | Kurtosis_CE                | 4           | Sphericity_NH              | 4           | Entropy_NH                 |
| 4            | Skewness_CE                | 4           | Uniformity_CE              | 4           | Cluster.shade_CE           | 4           | Compactness2_NH            |
| 4            | Uniformity_CE              | 4           | Compactness2_CE            | 4           | Energy_CE_T                | 4           | Sphericity_NH              |
| 4            | Compactness2_CE            | 4           | Spherical.disproportion_CE | 4           | Homogeneity1_CE            | 4           | Cluster.shade_CE           |
| 4            | Sphericity_CE              | 4           | Sphericity_CE              | 4           | Homogeneity2_CE            | 4           | Inverse.variance_CE        |
| 4            | Proportion_NH              | 4           | Surface.to.volume.ratio_CE | 4           | IMC1_CE                    | 4           | SRLGLE_CE                  |
| 4            | Entropy_NH                 | 4           | Spherical.disproportion_NC | 4           | IDMN_CE                    | 4           | IMC1_NC                    |
| 4            | Uniformity_NH              | 4           | Surface.to.volume.ratio_NC | 4           | IDN_CE                     | 4           | Cluster.shade_NH           |
| 4            | Compactness2_NH            | 4           | Entropy_NH                 | 4           | Inverse.variance_CE        | 4           | Energy_NH_T                |
| 4            | Spherical.disproportion_NH | 4           | Compactness2_NH            | 4           | Maximum.Probability_CE     | 4           | Homogeneity1_NH            |
| 4            | Sphericity_NH              | 4           | Spherical.disproportion_NH | 4           | SRE_CE                     | 4           | Homogeneity2_NH            |
| 4            | Surface.to.volume.ratio_NH | 4           | Sphericity_NH              | 4           | RLN_CE                     | 4           | IMC1_NH                    |
| 4            | Cluster.shade_CE           | 4           | Surface.to.volume.ratio_NH | 4           | HGLRE_CE                   | 4           | IDMN_NH                    |
| 4            | Energy_CE_T                | 4           | Cluster.shade_CE           | 4           | SRLGLE_CE                  | 4           | IDN_NH                     |
| 4            | Homogeneity1_CE            | 4           | Energy_CE_T                | 4           | SRHGLE_CE                  | 4           | Maximum.Probability_NH     |
| 4            | Homogeneity2_CE            | 4           | Homogeneity1_CE            | 4           | IMC1_NC                    | 4           | SRE_NH                     |
| 4            | IMC1_CE                    | 4           | Homogeneity2_CE            | 4           | Cluster.shade_NH           | 4           | RLN_NH                     |
| 4            | IDMN_CE                    | 4           | IMC1_CE                    | 4           | Energy_NH_T                | 4           | HGLRE_NH                   |
| 4            | IDN_CE                     | 4           | Inverse.variance_CE        | 4           | Homogeneity1_NH            | 4           | SRLGLE_NH                  |
| 4            | Inverse.variance_CE        | 4           | Maximum.Probability_CE     | 4           | Homogeneity2_NH            | 4           | SRHGLE_NH                  |
| 4            | Maximum.Probability_CE     | 4           | SRE_CE                     | 4           | IMC1_NH                    | 4           | Correlation_NH             |
| 4            | SRE_CE                     | 4           | RLN_CE                     | 4           | IDMN_NH                    | 4           | LRHGLE_CE                  |
| 4            | RLN_CE                     | 4           | HGLRE_CE                   | 4           | IDN_NH                     | 4           | Homogeneity2_CE            |
| 4            | HGLRE_CE                   | 4           | SRLGLE_CE                  | 4           | Maximum.Probability_NH     | 4           | Homogeneity1_CE            |
| 4            | SRLGLE_CE                  | 4           | SRHGLE_CE                  | 4           | SRE_NH                     | 4           | IMC1_CE                    |
| 4            | SRHGLE_CE                  | 4           | IMC1_NC                    | 4           | RLN_NH                     | 4           | IDMN_CE                    |
| 4            | IMC1_NC                    | 4           | Cluster.shade_NH           | 4           | HGLRE_NH                   | 4           | IDN_CE                     |
| 4            | Cluster.shade_NH           | 4           | Energy_NH_T                | 4           | SRLGLE_NH                  | 4           | RLN_CE                     |
| 4            | Energy_NH_T                | 4           | Homogeneity1_NH            | 4           | SRHGLE_NH                  | 4           | Maximum.Probability_CE     |
| 4            | Homogeneity1_NH            | 4           | Homogeneity2_NH            | 4           | Entropy_NH                 | 4           | Energy_CE_T                |
| 4            | Homogeneity2_NH            | 4           | IMC1_NH                    | 4           | Proportion_NH              | 4           | HGLRE_CE                   |
| 4            | IMC1_NH                    | 4           | IDMN_NH                    | 4           | Entropy_CE                 |             |                            |
| 4            | IDMN_NH                    | 4           | IDN_NH                     |             |                            | 5           | Surface.to.volume.ratio_CE |
| 4            | IDN_NH                     | 4           | Maximum.Probability_NH     | 5           | Surface.to.volume.ratio_CE | 5           | Spherical.disproportion_CE |
| 4            | Maximum.Probability_NH     | 4           | SRE_NH                     | 5           | Spherical.disproportion_CE | 5           | Spherical.disproportion_NC |
| 4            | SRE_NH                     | 4           | RLN_NH                     | 5           | Spherical.disproportion_NH | 5           | Surface.to.volume.ratio_NC |
| 4            | RLN_NH                     | 4           | HGLRE_NH                   | 5           | Surface.area_NH            | 5           | Kurtosis_NH                |
| 4            | HGLRE_NH                   | 4           | SRLGLE_NH                  | 5           | Surface.to.volume.ratio_NH | 5           | Skewness_NH                |
| 4            | SRLGLE_NH                  | 4           | SRHGLE_NH                  | 5           | Area_NH                    | 5           | Uniformity_NH              |
| 4            | SRHGLE_NH                  |             |                            | 5           | Energy_NH                  | 5           | Spherical.disproportion_NH |
|              |                            | 5           | Slope_NH                   | 5           | Slope_NH                   | 5           | SRLGLE_NC                  |
| 5            | Slope_NH                   | 5           | Energy_NH                  | 5           | Maximum_NH                 | 5           | SRHGLE_NC                  |
| 5            | Energy_NH                  | 5           | Maximum_NH                 | 5           | Mean_NH                    | 5           | Surface.area_NH            |
| 5            | Kurtosis_NH                | 5           | Mean_NH                    | 5           | Mean.absolute.deviation_NH | 5           | Slope_NH                   |
| 5            | Maximum_NH                 | 5           | Mean.absolute.deviation_NH | 5           | Median_NH                  | 5           | Energy_NH                  |
| 5            | Mean_NH                    | 5           | Median_NH                  | 5           | Minimum_NH                 | 5           | Maximum_NH                 |
| 5            | Mean.absolute.deviation_NH | 5           | Range_NH                   | 5           | Range_NH                   | 5           | Mean_NH                    |
| 5            | Median_NH                  | 5           | RMS_NH                     | 5           | RMS_NH                     | 5           | Mean.absolute.deviation_NH |
| 5            | Minimum_NH                 | 5           | Standard.deviation_NH      | 5           | Standard.deviation_NH      | 5           | Median_NH                  |
| 5            | Range_NH                   | 5           | Variance_NH                | 5           | Variance_NH                | 5           | Minimum_NH                 |
| 5            | RMS_NH                     | 5           | SRE_NC                     | 5           | Auto.correlation_NH        | 5           | Range_NH                   |
| 5            | Skewness_NH                | 5           | SRLGLE_NC                  | 5           | Cluster.prominence_NH      | 5           | RMS_NH                     |
| 5            | Standard.deviation_NH      | 5           | SRHGLE_NC                  | 5           | Cluster.tendency_NH        | 5           | Standard.deviation_NH      |
| 5            | Variance_NH                | 5           | Auto.correlation_NH        | 5           | Contrast_NH                | 5           | Variance_NH                |
| 5            | SRE_NC                     | 5           | Cluster.prominence_NH      | 5           | Correlation_NH             | 5           | Surface.to.volume.ratio_NH |
| 5            | SRLGLE_NC                  | 5           | Cluster.tendency_NH        | 5           | Difference.entropy_NH      | 5           | SRE_NC                     |
| 5            | SRHGLE_NC                  | 5           | Contrast_NH                | 5           | Dissimilarity_NH           | 5           | Auto.correlation_NH        |
| 5            | Auto.correlation_NH        | 5           | Correlation_NH             | 5           | Entropy_NH_T               | 5           | Cluster.prominence_NH      |
| 5            | Cluster.prominence_NH      | 5           | Difference.entropy_NH      | 5           | IMC2_NH                    | 5           | Cluster.tendency_NH        |
| 5            | Cluster.tendency_NH        | 5           | Dissimilarity_NH           | 5           | Inverse.variance_NH        | 5           | Contrast_NH                |
| 5            | Contrast_NH                | 5           | Entropy_NH_T               | 5           | Sum.average_NH             | 5           | Difference.entropy_NH      |
| 5            | Correlation_NH             | 5           | IMC2_NH                    | 5           | Sum.entropy_NH             | 5           | Dissimilarity_NH           |
| 5            | Difference.entropy_NH      | 5           | Inverse.variance_NH        | 5           | Sum.variance_NH            | 5           | Entropy_NH_T               |
| 5            | Dissimilarity_NH           | 5           | Sum.average_NH             | 5           | Variance_NH_T              | 5           | IMC2_NH                    |
| 5            | Entropy_NH_T               | 5           | Sum.entropy_NH             | 5           | LRE_NH                     | 5           | Inverse.variance_NH        |
| 5            | IMC2_NH                    | 5           | Sum.variance_NH            | 5           | GLN_NH                     | 5           | Sum.average_NH             |
| 5            | Inverse.variance_NH        | 5           | Variance_NH_T              | 5           | RP_NH                      | 5           | Sum.entropy_NH             |
| 5            | Sum.average_NH             | 5           | LRE_NH                     | 5           | LGLRE_NH                   | 5           | Sum.variance_NH            |
| 5            | Sum.entropy_NH             | 5           | GLN_NH                     | 5           | LRLGLE_NH                  | 5           | Variance_NH_T              |
| 5            | Variance_NH_T              | 5           | RP_NH                      | 5           | LRHGLE_NH                  | 5           | LRE_NH                     |
| 5            | LRE_NH                     | 5           | LGLRE_NH                   | 5           | Edgesharpness_NH           | 5           | GLN_NH                     |
| 5            | GLN_NH                     | 5           | LRLGLE_NH                  | 5           | Skewness_NH                | 5           | RP_NH                      |
| 5            | RP_NH                      | 5           | LRHGLE_NH                  | 5           | Kurtosis_NH                | 5           | LGLRE_NH                   |
| 5            | LGLRE_NH                   | 5           | Skewness_NH                | 5           | Uniformity_NH              | 5           | LRLGLE_NH                  |
| 5            | LRLGLE_NH                  | 5           | Kurtosis_NH                | 5           | SRE_NC                     | 5           | LRHGLE_NH                  |
| 5            | LRHGLE_NH                  | 5           | Uniformity_NH              | 5           | SRHGLE_NC                  | 5           | Longestaxis_NH             |
| 5            | LRHGLE_NH                  | 5           | Minimum_NH                 | 5           | SRLGLE_NC                  | 5           | Area_NH                    |

CE = contrast enhancing, NC = necrotic, NH = non-enhancing T2 high signal intensity, T = texture feature
